# Supplementary material for: Label-free quantitation of the changes in salivary proteome associated with the chronic consumption of the betel nut ( Areca catechu )
Source: Royal Society of Chemistry journal article supplement (doi:10.1039/d1mo00391g), 2021-11-22
Supplement: d1mo00391g1.xlsx [file d1mo00391g1.xlsx]

## Sheet: Supp T1
Table S1: Supplementry data contaning proteins after the fitration step on the basis of three valid value in a at least each group.
Majority protein IDs	C1	C2	C3	C4	C5	C6	C7	C8	B2	B3	B4	B6	B7	B9	B10	B11	B12	B13	B14	B15	B16	B17	B22	B23	B24	Peptides	Razor + unique peptides	Unique peptides	Protein IDs
sp|Q14515-2|SPRL1_HUMAN	24.3701	24.9693	NaN	24.2933	NaN	NaN	NaN	24.3926	25.5861	24.638	25.0141	NaN	24.8483	25.6566	24.7423	25.9069	NaN	24.6476	NaN	NaN	25.9833	NaN	24.6711	24.5959	NaN	6	6	6	Q14515-2
tr|A0A087WWU8|A0A087WWU8_HUMAN	NaN	26.3318	NaN	26.6644	26.7422	NaN	NaN	26.293	NaN	25.8938	NaN	NaN	NaN	NaN	25.5802	NaN	NaN	25.676	NaN	NaN	NaN	NaN	NaN	NaN	NaN	14	14	14	A0A087WWU8
tr|A0A2Q2TTZ9|A0A2Q2TTZ9_HUMAN	25.1344	25.6969	25.8104	NaN	25.1353	25.2143	NaN	25.4171	NaN	24.3615	26.15	24.6817	NaN	NaN	NaN	23.8977	NaN	NaN	24.7722	NaN	24.7122	NaN	23.6941	24.9997	NaN	2	2	2	A0A2Q2TTZ9
sp|Q01518|CAP1_HUMAN	25.9305	25.4702	NaN	25.1306	25.768	25.5392	NaN	NaN	26.1417	25.5813	NaN	NaN	NaN	NaN	25.6821	NaN	NaN	23.7982	NaN	NaN	25.2935	NaN	NaN	NaN	24.8789	8	8	8	Q01518
sp|P01619|KV320_HUMAN	28.2806	28.0768	28.8553	28.8089	28.1309	28.4766	NaN	28.4581	NaN	26.4557	27.9395	29.5254	NaN	NaN	NaN	28.1101	27.6486	28.5855	NaN	27.9747	NaN	28.7792	27.0011	28.6436	27.5955	4	4	1	P01619
sp|P23280|CAH6_HUMAN	28.4521	28.8905	28.1705	28.4041	28.7914	28.4786	NaN	NaN	27.3476	27.0647	NaN	NaN	25.1316	28.6352	27.5251	28.2383	29.6282	29.3885	28.5797	29.4213	25.2371	25.7777	31.7862	NaN	NaN	12	12	3	P23280
sp|O95274|LYPD3_HUMAN	24.8594	24.298	NaN	NaN	NaN	NaN	24.9085	NaN	NaN	23.7168	NaN	25.2095	25.0155	NaN	NaN	25.1442	NaN	NaN	NaN	NaN	NaN	NaN	24.9351	24.752	NaN	6	6	6	O95274
sp|P18206|VINC_HUMAN	24.3585	24.1648	NaN	NaN	NaN	NaN	24.337	NaN	23.0895	23.6985	NaN	NaN	NaN	NaN	NaN	NaN	NaN	NaN	NaN	NaN	NaN	NaN	24.2726	23.5547	NaN	8	8	8	P18206
sp|P06870-2|KLK1_HUMAN	NaN	28.0964	NaN	28.3275	NaN	NaN	28.3114	28.3755	NaN	NaN	28.0885	29.8098	NaN	NaN	30.9764	30.2488	NaN	NaN	NaN	NaN	NaN	29.1166	NaN	29.4193	28.2578	4	4	4	P06870-2
sp|P37837|TALDO_HUMAN	NaN	26.3991	26.7118	26.6627	NaN	NaN	26.134	NaN	26.6619	NaN	24.8248	NaN	NaN	NaN	NaN	25.2617	NaN	NaN	24.669	NaN	25.951	25.6868	NaN	26.094	NaN	8	8	8	P37837
tr|A0A5H1ZRS2|A0A5H1ZRS2_HUMAN	NaN	NaN	NaN	NaN	26.4456	NaN	26.441	26.679	NaN	NaN	27.0212	29.3461	NaN	NaN	28.9499	27.8418	NaN	26.4364	29.0604	NaN	NaN	28.7315	26.9947	NaN	27.5362	4	4	3	A0A5H1ZRS2
sp|P49913|CAMP_HUMAN	26.3745	NaN	NaN	NaN	26.5683	NaN	26.4309	NaN	25.7184	25.7145	NaN	NaN	27.6754	NaN	NaN	NaN	NaN	NaN	NaN	NaN	NaN	NaN	26.875	27.1881	27.3696	8	8	8	P49913
sp|P04083|ANXA1_HUMAN	24.3586	24.014	NaN	NaN	24.1584	NaN	24.2507	24.8462	24.392	24.3458	NaN	NaN	NaN	NaN	NaN	24.8255	NaN	23.733	NaN	NaN	24.937	23.0373	NaN	23.112	23.9637	14	14	14	P04083
sp|P01009|A1AT_HUMAN	NaN	NaN	NaN	26.5751	26.8853	NaN	26.5429	NaN	NaN	29.294	27.505	NaN	28.7806	NaN	NaN	26.1751	NaN	NaN	26.3801	NaN	NaN	NaN	NaN	NaN	NaN	15	15	15	P01009
sp|P04075|ALDOA_HUMAN	26.2664	NaN	NaN	26.3514	26.6385	NaN	26.1699	26.3973	26.791	26.2664	25.6255	NaN	26.2143	25.9349	25.752	NaN	NaN	NaN	25.4468	25.7841	26.5081	26.0715	26.7304	26.1113	26.4647	18	18	17	P04075
sp|P01034|CYTC_HUMAN	NaN	25.6722	NaN	25.8109	25.3155	NaN	25.7839	25.8083	26.9327	26.5993	NaN	NaN	26.4722	NaN	25.8191	26.4457	25.6837	NaN	NaN	NaN	NaN	25.5895	25.2366	25.7146	25.7409	6	6	6	P01034
sp|P12814-3|ACTN1_HUMAN	NaN	25.6223	NaN	25.2222	24.918	NaN	25.33	25.9092	26.7833	24.2334	NaN	NaN	NaN	NaN	NaN	NaN	NaN	NaN	NaN	NaN	NaN	NaN	NaN	25.4042	25.3731	11	11	7	P12814-3
sp|Q9Y6R7|FCGBP_HUMAN	NaN	27.5752	27.4454	27.4976	27.8661	NaN	27.7678	27.9352	29.8883	24.8399	26.7008	27.8995	28.2171	26.1734	28.4599	24.2852	27.4036	NaN	27.3352	NaN	NaN	NaN	30.0897	NaN	28.0071	54	54	54	Q9Y6R7
tr|A0A0C4DGN4|A0A0C4DGN4_HUMAN	NaN	26.9674	27.8643	27.0559	27.2112	NaN	27.651	27.9078	31.0525	30.7398	30.1499	NaN	28.8353	NaN	27.077	NaN	29.3392	28.2333	27.0053	29.0293	27.6543	NaN	26.7155	26.5329	28.2856	6	6	6	A0A0C4DGN4
tr|A0A590UJZ9|A0A590UJZ9_HUMAN	NaN	30.6962	30.4485	30.1564	29.6314	NaN	29.5227	NaN	29.5799	29.5527	29.5334	31.9774	29.4039	28.5451	29.1433	31.1145	30.088	30.2127	NaN	NaN	29.818	30.0567	29.3163	29.4549	29.3004	13	13	13	A0A590UJZ9
sp|Q6P5S2|LEG1H_HUMAN	27.9803	27.5346	27.7899	27.0404	27.7109	NaN	27.3649	27.7786	25.3193	NaN	26.0486	28.4994	26.7811	29.4374	28.0976	29.0777	29.179	28.7327	NaN	27.922	29.9161	27.896	28.9984	28.6914	28.0697	10	10	10	Q6P5S2
tr|A0A087WYT0|A0A087WYT0_HUMAN	30.524	30.5711	30.6534	29.4233	30.3257	NaN	30.3541	30.6248	29.2035	28.2473	NaN	NaN	29.1081	33.4631	30.483	28.7221	32.4873	31.3139	31.7562	31.875	30.6574	NaN	33.6289	NaN	30.7191	9	9	1	A0A087WYT0
sp|P0C0L4|CO4A_HUMAN	NaN	NaN	NaN	NaN	NaN	23.2527	23.3386	23.0444	23.2542	28.0771	25.7778	NaN	NaN	NaN	NaN	NaN	NaN	NaN	NaN	NaN	NaN	NaN	NaN	NaN	NaN	26	26	26	P0C0L4
sp|P32926|DSG3_HUMAN	24.1451	NaN	NaN	NaN	NaN	24.5486	23.9781	NaN	NaN	24.9549	NaN	24.5002	NaN	NaN	NaN	24.3431	24.5827	NaN	24.8241	NaN	NaN	24.6901	24.1069	NaN	NaN	8	8	8	P32926
sp|P23528|COF1_HUMAN	NaN	27.0269	NaN	27.6266	NaN	27.5641	27.5742	NaN	27.5779	27.7392	NaN	NaN	25.2689	NaN	26.4169	NaN	NaN	NaN	NaN	NaN	NaN	NaN	23.2338	NaN	NaN	10	10	9	P23528
sp|P02647|APOA1_HUMAN	NaN	NaN	26.5144	26.0424	NaN	26.9228	26.8514	26.3532	24.9165	30.0462	26.5291	NaN	NaN	26.2392	NaN	NaN	NaN	NaN	25.1671	NaN	NaN	NaN	26.4998	NaN	24.8359	11	11	11	P02647
sp|P10909-4|CLUS_HUMAN	NaN	25.424	25.6556	25.9317	NaN	25.1123	25.2551	25.6722	NaN	26.4352	26.4529	25.2118	28.7347	NaN	NaN	25.711	NaN	26.2911	25.8666	NaN	26.1288	NaN	24.7	NaN	NaN	10	10	10	P10909-4
sp|P07237|PDIA1_HUMAN	NaN	NaN	NaN	NaN	24.8033	24.6569	24.3687	24.2408	24.457	24.1781	24.5609	NaN	NaN	NaN	NaN	24.3308	NaN	NaN	NaN	NaN	25.1638	NaN	24.4242	NaN	NaN	12	12	12	P07237
sp|P20160|CAP7_HUMAN	NaN	NaN	NaN	NaN	25.4091	25.2283	25.0841	NaN	NaN	NaN	24.9371	26.171	NaN	NaN	NaN	24.1197	NaN	NaN	NaN	NaN	NaN	NaN	25.1215	NaN	NaN	2	2	2	P20160
tr|F5H3P3|F5H3P3_HUMAN	26.6927	NaN	NaN	NaN	26.3554	26.1027	26.7869	26.4123	26.1729	26.5878	26.4488	NaN	NaN	26.0125	NaN	NaN	NaN	NaN	NaN	26.087	NaN	26.7414	NaN	NaN	26.237	10	10	10	F5H3P3
sp|P09960|LKHA4_HUMAN	24.4344	24.0249	NaN	NaN	24.4781	24.8224	24.7445	24.6349	25.3563	25.3717	24.7302	NaN	NaN	NaN	NaN	NaN	NaN	NaN	NaN	NaN	NaN	25.323	24.8687	24.9623	NaN	8	8	8	P09960
sp|P02675|FIBB_HUMAN	25.6766	25.8664	NaN	NaN	24.9608	25.3072	25.8202	25.5831	26.7017	27.7363	25.4315	NaN	NaN	NaN	NaN	25.8526	NaN	24.6777	NaN	26.0871	25.0476	NaN	NaN	24.4684	26.8014	14	14	14	P02675
sp|P00338|LDHA_HUMAN	27.6144	27.114	NaN	NaN	27.3235	26.9322	27.2902	27.1488	26.1504	NaN	25.5955	NaN	25.774	NaN	NaN	NaN	NaN	NaN	NaN	NaN	26.2434	NaN	26.4979	26.8255	26.2979	6	6	5	P00338
sp|P10163|PRB4_HUMAN	26.419	NaN	26.7234	NaN	26.7515	26.8313	26.768	NaN	NaN	NaN	NaN	NaN	NaN	NaN	24.9837	NaN	28.7489	28.0541	NaN	NaN	NaN	NaN	31.9403	26.8093	NaN	5	5	4	P10163
sp|P80723|BASP1_HUMAN	26.5461	26.6573	26.2401	NaN	26.7402	25.9984	26.198	25.9407	24.9705	25.4507	24.4526	NaN	NaN	NaN	25.671	24.9169	NaN	NaN	NaN	NaN	25.9102	26.1663	26.7532	26.2641	25.7654	9	9	9	P80723
tr|E9PFZ2|E9PFZ2_HUMAN	NaN	NaN	NaN	24.0001	23.9701	24.6202	24.8877	24.3102	NaN	27.8713	26.2474	NaN	24.5346	NaN	23.1195	NaN	NaN	NaN	NaN	NaN	24.4705	NaN	NaN	23.9357	23.597	13	13	13	E9PFZ2
sp|P02763|A1AG1_HUMAN	NaN	NaN	NaN	26.8457	25.9377	25.9798	26.047	26.6252	NaN	27.7653	27.1882	NaN	NaN	NaN	NaN	NaN	NaN	25.6869	NaN	25.8082	26.8009	NaN	NaN	NaN	NaN	5	5	2	P02763
sp|Q01469|FABP5_HUMAN	26.5725	NaN	NaN	26.8746	26.4474	26.2225	26.6804	NaN	NaN	27.2223	25.9347	NaN	25.9912	26.837	NaN	26.5454	27.1556	NaN	NaN	NaN	NaN	26.5158	26.2657	NaN	26.97	8	8	8	Q01469
sp|P30740|ILEU_HUMAN	NaN	25.6862	NaN	25.4776	25.135	25.5936	25.6902	25.1514	25.8424	25.2348	24.9017	NaN	25.8789	NaN	NaN	25.3679	NaN	NaN	NaN	NaN	24.9259	24.4823	25.7377	NaN	NaN	12	12	12	P30740
sp|O75594|PGRP1_HUMAN	NaN	25.1562	NaN	25.9305	25.849	25.3403	25.0732	25.5519	26.4729	24.6571	25.6694	25.4863	NaN	NaN	NaN	24.8768	NaN	24.6865	NaN	24.9621	24.6564	25.2326	24.1429	25.1622	25.2477	4	4	4	O75594
sp|P62937|PPIA_HUMAN	NaN	25.5229	NaN	25.9372	25.5312	25.7474	25.6578	25.4518	25.8983	25.1216	NaN	NaN	25.6421	NaN	25.828	26.5785	NaN	25.8078	NaN	NaN	26.3654	25.9153	NaN	25.3365	25.1628	9	9	9	P62937
sp|Q08380|LG3BP_HUMAN	NaN	26.5344	NaN	26.0506	26.7651	26.3673	26.8588	26.5875	26.5839	26.7017	26.9705	NaN	26.3693	26.27	25.2326	26.9363	26.1496	26.2321	NaN	26.4203	26.3615	25.9678	26.0676	26.5056	25.1247	8	8	8	Q08380
sp|P14618|KPYM_HUMAN	NaN	25.4799	NaN	25.3935	25.3642	25.4795	25.4692	NaN	24.2872	26.3727	24.3047	NaN	NaN	25.7175	27.0727	26.8943	24.6671	NaN	NaN	NaN	NaN	NaN	NaN	23.5674	NaN	14	14	14	P14618
tr|U3KPS2|U3KPS2_HUMAN	NaN	26.5574	NaN	26.528	26.5245	26.7397	26.533	NaN	28.1596	27.4672	27.5379	NaN	NaN	NaN	NaN	25.7256	NaN	25.4215	25.4673	26.9091	NaN	26.8003	NaN	24.9958	26.9141	5	5	5	U3KPS2
sp|P01859|IGHG2_HUMAN	NaN	26.6601	NaN	26.0614	26.5757	26.469	26.2767	NaN	26.4305	27.7446	27.5054	NaN	26.632	NaN	NaN	NaN	NaN	27.8648	NaN	NaN	29.2252	NaN	27.7711	27.7869	25.5589	10	4	3	P01859
sp|P31146|COR1A_HUMAN	25.6623	25.9248	NaN	25.8462	25.851	25.9337	25.3129	25.3736	26.3861	25.9252	NaN	NaN	NaN	NaN	NaN	24.7758	NaN	NaN	NaN	NaN	NaN	NaN	NaN	26.0302	25.961	8	8	8	P31146
sp|P04217|A1BG_HUMAN	24.43	24.3835	NaN	24.7494	24.537	24.2245	24.7103	24.6385	25.3229	27.108	26.4102	NaN	NaN	NaN	NaN	NaN	NaN	NaN	NaN	NaN	NaN	NaN	NaN	23.4645	NaN	5	5	5	P04217
sp|P02774|VTDB_HUMAN	25.2487	25.9737	NaN	25.8096	25.4226	25.2879	25.8468	25.6507	25.5493	27.0197	26.7493	26.2002	26.1564	NaN	NaN	NaN	NaN	NaN	NaN	26.0962	NaN	25.3235	NaN	25.1305	25.8175	18	18	18	P02774
sp|P04040|CATA_HUMAN	25.368	25.4516	NaN	25.355	25.8588	25.319	25.9957	25.8503	26.5305	25.3465	25.1345	NaN	25.1934	NaN	NaN	NaN	NaN	NaN	NaN	NaN	25.585	NaN	25.2664	24.6951	25.9869	17	17	17	P04040
sp|P00558-2|PGK1_HUMAN	24.816	24.7462	NaN	24.4741	24.9029	24.9116	24.1351	24.0966	26.5446	27.2151	26.549	NaN	NaN	25.2795	25.8093	26.249	NaN	25.0635	26.0198	26.2278	25.4702	26.5494	25.4543	24.58	25.0137	13	13	13	P00558-2
sp|P60174-1|TPIS_HUMAN	27.9247	27.4383	NaN	27.4745	27.6012	27.1939	27.5005	27.9847	27.6915	26	25.2958	26.9884	NaN	26.822	26.1967	27.0317	NaN	25.9783	25.8313	24.9682	26.5721	26.9464	27.7848	27.1407	26.473	13	13	13	P60174-1
tr|A0A0G2JMB2|A0A0G2JMB2_HUMAN	27.7872	27.9764	NaN	27.7077	27.4222	27.7085	27.6587	27.9881	27.4855	24.684	27.5854	27.7724	27.8989	26.7023	27.5823	28.1319	27.6429	28.4448	26.8204	27.5911	27.7786	27.283	28.3119	29.1229	28.066	14	4	1	A0A0G2JMB2
sp|P69905|HBA_HUMAN	25.5625	25.8635	NaN	25.0934	25.1623	24.9365	25.8061	25.8222	28.1785	27.0749	26.7996	NaN	26.4302	NaN	27.0123	NaN	NaN	27.1543	28.3778	NaN	27.4993	NaN	26.667	NaN	26.2863	10	10	3	P69905
sp|P68871|HBB_HUMAN	27.638	27.8936	NaN	27.5078	27.6793	27.016	27.3364	27.218	29.7706	28.9866	29.7521	26.8801	28.6079	27.8574	27.666	NaN	NaN	28.3628	30.0902	25.8667	28.7581	27.3347	28.3904	NaN	27.2284	12	12	6	P68871
sp|P09211|GSTP1_HUMAN	25.0291	25.1653	NaN	25.614	25.9525	25.8251	25.9599	NaN	25.359	25.1395	NaN	24.6801	24.98	NaN	NaN	NaN	NaN	24.6631	NaN	24.6763	25.8207	25.0441	25.3038	NaN	NaN	3	3	3	P09211
sp|P63104|1433Z_HUMAN	24.7727	24.4142	NaN	24.5012	24.2021	24.7693	24.7753	NaN	25.307	24.8447	24.6763	NaN	NaN	NaN	NaN	NaN	NaN	NaN	NaN	NaN	NaN	NaN	24.0359	24.4688	23.528	8	6	6	P63104
sp|P10599|THIO_HUMAN	27.543	27.5607	NaN	27.9483	27.7806	27.8534	27.6964	NaN	27.3815	27.2326	NaN	26.622	28.5237	27.2256	27.6736	27.618	27.6914	NaN	27.7294	26.9519	27.1339	27.359	27.7787	28.0555	27.8381	8	8	8	P10599
sp|P01037|CYTN_HUMAN	NaN	NaN	27.7851	27.5357	27.1988	27.8193	27.1853	27.8863	28.1306	27.5988	NaN	NaN	29.5946	29.7113	30.0268	30.281	27.7819	29.431	27.8722	27.493	27.4187	29.0781	28.8452	27.2383	28.7872	14	9	9	P01037
sp|P59666|DEF3_HUMAN	31.9487	NaN	31.6981	31.7565	31.5132	31.9864	31.1244	30.1281	29.288	30.1465	29.6827	30.4124	29.116	28.494	27.6774	30.1211	30.9244	28.8709	NaN	30.239	30.2706	30.3997	31.6176	31.2109	33.3255	4	4	4	P59666
sp|P0DP25|CALM3_HUMAN	NaN	25.4386	25.6726	25.378	25.7189	25.9665	25.3709	25.1994	26.3628	26.0025	NaN	NaN	NaN	NaN	NaN	NaN	NaN	NaN	NaN	NaN	25.642	NaN	NaN	25.9086	23.4765	4	4	4	P0DP25
sp|Q96DR5|BPIA2_HUMAN	NaN	29.9385	29.2983	29.9435	29.7512	29.3363	29.4642	29.5541	28.8734	28.9887	28.357	NaN	28.2986	27.5769	29.3603	27.4602	29.1091	28.6536	27.3634	26.2098	NaN	28.6153	28.4619	25.0023	28.5986	13	13	13	Q96DR5
sp|P02679-2|FIBG_HUMAN	25.4025	25.6761	25.7868	25.7203	25.0226	25.6786	25.4	25.7026	27.9694	28.5771	27.3114	NaN	NaN	NaN	NaN	NaN	NaN	24.4104	25.5102	25.645	NaN	NaN	23.5249	25.1181	26.9641	15	15	15	P02679-2
sp|P28325|CYTD_HUMAN	26.332	25.9376	26.8859	26.7733	26.9174	26.1663	26.3297	26.245	25.2509	25.8461	27.6711	NaN	28.0959	28.1569	28.455	27.3834	26.833	27.3445	27.3512	NaN	25.9896	26.9815	28.055	26.4953	27.6203	4	4	4	P28325
sp|Q8TDL5|BPIB1_HUMAN	26.5292	26.4231	26.1192	26.2906	25.9536	26.3714	25.8221	25.7378	27.5983	27.1125	25.7822	26.1225	27.53	25.5503	NaN	26.6539	26.8073	26.7918	27.3335	NaN	NaN	NaN	25.0223	26.3359	26.3574	14	14	14	Q8TDL5
sp|P05164-2|PERM_HUMAN	26.1446	26.4735	26.2157	26.6225	26.395	26.152	26.1945	26.2163	25.4491	25.9826	27.3862	26.5699	28.1305	24.0766	25.822	25.9168	NaN	26.0593	NaN	26.5719	26.3209	25.0623	26.8716	26.0052	27.2136	17	17	17	P05164-2
sp|P61769|B2MG_HUMAN	27.1464	27.2655	27.4841	27.3955	27.4561	27.6395	27.0928	26.2747	23.9606	27.6391	26.8895	27.1404	25.6938	27.5496	26.673	26.9615	NaN	26.9422	28.3522	29.0141	27.8524	28.4897	29.3743	28.3103	27.0607	4	4	4	P61769
sp|P14780|MMP9_HUMAN	26.155	26.1332	26.6272	25.9358	26.1637	26.459	26.8658	26.7821	27.6728	26.2321	26.4875	NaN	25.4114	NaN	NaN	NaN	NaN	25.3114	NaN	NaN	26.9006	26.256	25.9202	25.94	25.9927	15	15	15	P14780
sp|P13796|PLSL_HUMAN	26.8282	26.5863	26.0966	26.7525	26.8611	26.2605	26.7316	26.9381	28.1177	26.1318	26.6836	NaN	25.3624	NaN	NaN	NaN	NaN	NaN	NaN	NaN	26.3017	26.5885	26.3059	27.0884	26.164	20	20	20	P13796
sp|P04406|G3P_HUMAN	28.5872	28.9026	28.3705	28.2266	28.4251	28.7127	28.9265	26.9803	25.8277	27.3049	26.8219	NaN	26.6171	NaN	28.1469	28.3951	NaN	27.1109	26.5719	27.2652	27.4654	27.6155	27.5154	26.0547	27.248	11	11	11	P04406
sp|P02790|HEMO_HUMAN	25.8065	25.1111	25.4585	25.9403	25.6391	25.3834	25.181	25.0156	26.4877	27.7572	26.8114	NaN	25.0309	NaN	NaN	NaN	NaN	25.8252	25.7574	25.602	25.9093	NaN	23.9739	25.2522	25.4799	5	5	5	P02790
tr|A0A4W8ZXM2|A0A4W8ZXM2_HUMAN	27.0716	27.9445	27.3118	27.9422	27.2261	27.5268	27.4775	27.0709	25.2043	25.29	28.214	28.7667	25.3972	24.5033	NaN	28.7562	NaN	28.1532	26.5839	26.6562	26.9992	26.4551	27.0966	28.8356	27.2968	3	3	1	A0A4W8ZXM2
sp|P09228|CYTT_HUMAN	27.1242	27.8015	27.7087	27.657	27.3311	27.2928	27.0106	27.1737	27.1459	27.416	28.6644	NaN	27.5491	29.9005	29.4191	27.6957	27.4695	29.9906	27.762	27.2984	26.6287	29.2891	27.0837	27.4093	29.4114	13	5	5	P09228
sp|P0DMV9|HS71B_HUMAN	26.6435	26.3011	26.6127	26.6707	26.4261	26.49	26.9669	26.3758	27.0167	26.8522	NaN	NaN	25.8071	24.8584	25.8204	NaN	24.4775	25.6887	NaN	NaN	26.2681	26.0886	25.7303	26.4426	25.914	19	19	11	P0DMV9
sp|P61626|LYSC_HUMAN	27.529	27.6214	27.0122	27.3239	27.1077	27.1918	27.1227	27.3948	28.4944	29.0284	26.9705	NaN	33.0665	28.2978	27.0772	28.7063	28.3572	28.6902	26.6946	29.5217	28.8085	27.346	29.0745	29.1153	28.0142	7	7	7	P61626
sp|P06744|G6PI_HUMAN	26.8979	26.8018	26.5473	26.3143	26.8763	26.6885	26.042	26.402	27.1831	26.3737	25.8609	NaN	26.1382	25.2648	25.9873	26.71	NaN	25.3957	NaN	25.4238	25.7287	27.2777	26.1276	27.3429	27.0411	13	13	9	P06744
sp|P01024|CO3_HUMAN	27.3298	27.3461	27.0206	27.0961	27.0238	27.0781	27.5912	27.7776	27.5351	30.2009	29.4655	28.3802	26.4041	26.0409	25.9577	24.2541	NaN	25.7767	24.3977	24.0906	24.7409	22.8343	25.9932	27.8144	27.606	59	59	59	P01024
tr|X6R8F3|X6R8F3_HUMAN	27.4253	27.5726	27.9114	27.6728	27.2028	27.0137	27.7804	27.8177	27.7317	28.4103	27.6023	26.8298	27.2207	25.7287	25.3667	27.8764	26.4232	27.0813	NaN	26.7954	26.6967	27.4767	26.8971	27.3382	27.0842	8	8	8	X6R8F3
sp|P06733|ENOA_HUMAN	28.8598	28.6154	28.1777	28.6158	28.9872	28.3154	28.3781	28.9217	29.11	28.5938	27.4892	NaN	27.9695	27.2886	26.8903	27.9593	27.5262	27.3527	27.7954	27.1766	28.4842	28.7348	28.3793	28.828	28.9931	23	23	23	P06733
sp|P22079|PERL_HUMAN	28.3347	28.541	28.4049	28.825	28.0732	28.4038	28.7784	28.1656	29.3658	29.0092	28.8551	NaN	29.8581	29.8572	30.3677	29.5718	28.7983	29.2593	26.7044	28.5703	28.1571	27.3755	30.0475	27.562	27.8459	19	19	19	P22079
sp|P07737|PROF1_HUMAN	27.0289	27.1425	27.5078	27.0325	27.9353	27.3035	27.9204	27.2007	28.3794	28.2463	28.2476	NaN	28.503	27.6705	28.4023	27.5093	27.0996	26.9385	NaN	NaN	28.2997	28.6289	27.1982	28.0081	28.4589	8	8	8	P07737
sp|P01871|IGHM_HUMAN	28.8943	28.191	28.022	28.0994	28.3663	28.1096	28.6603	28.3658	27.4912	27.9022	29.2097	28.0446	28.4122	25.2097	27.1199	28.4413	29.5386	29.903	25.811	26.694	27.541	26.655	28.5601	27.3759	30.9548	18	18	18	P01871
sp|P01860|IGHG3_HUMAN	28.2687	28.1812	28.5325	28.5875	28.0379	28.7221	28.8409	28.4107	28.7947	29.7364	28.5307	NaN	25.8031	NaN	NaN	26.3237	NaN	27.6812	NaN	NaN	NaN	NaN	NaN	27.3561	27.7194	11	4	3	P01860
sp|P04080|CYTB_HUMAN	28.819	28.0264	28.8777	28.4147	28.9368	28.9188	28.5589	28.4455	27.9692	28.4765	27.9068	27.6298	28.0709	NaN	28.177	28.4344	29.325	28.6081	28.2737	27.8848	29.0772	28.3721	27.2517	27.6171	29.6112	6	6	6	P04080
sp|P01023|A2MG_HUMAN	27.6313	27.71	27.4399	27.531	27.5878	27.1513	27.6892	27.4579	30.4118	31.0447	30.0506	27.9767	24.7063	25.5876	26.3559	24.1278	23.0581	24.0737	28.2278	28.5697	24.7952	27.0345	26.6867	28.13	27.7111	49	49	49	P01023
sp|P62328|TYB4_HUMAN	28.471	28.0677	28.7943	28.3367	28.0339	28.2194	28.9972	28.5162	27.2248	27.605	27.3835	NaN	26.8861	27.847	NaN	26.8099	NaN	26.7542	NaN	NaN	28.2644	28.0753	28.1412	27.5874	28.1759	9	9	7	P62328
sp|B9A064|IGLL5_HUMAN	28.8778	28.6838	28.9534	28.0629	28.642	28.307	28.4397	28.5164	28.7892	29.4778	29.6427	31.4266	28.5846	29.8277	29.141	29.8876	28.5157	29.6259	28.523	NaN	29.5809	28.2533	28.9986	29.9916	27.6665	8	6	5	B9A064
sp|P02788-2|TRFL_HUMAN	29.1672	29.6955	29.8396	29.3139	29.5645	29.7169	29.1708	29.6909	28.3379	29.6837	30.1352	29.7676	33.084	30.2481	30.1158	30.2483	28.4119	29.2571	28.6078	30.7893	30.0659	28.9941	30.786	29.9448	29.3609	51	51	48	P02788-2
sp|P29401|TKT_HUMAN	28.2861	28.8102	28.5446	28.029	28.1571	28.1031	28.433	28.7384	29.0167	26.6099	27.5743	NaN	25.7281	27.6329	27.519	27.7481	NaN	26.1908	25.4065	26.5305	27.1864	27.5206	27.283	27.6776	27.8713	25	25	25	P29401
sp|P31025|LCN1_HUMAN	31.1767	31.4473	31.3353	31.3437	31.5403	31.2918	31.5285	31.7653	30.1229	30.8135	27.7901	30.5488	31.7517	31.4209	29.5462	31.0596	31.4117	30.9462	31.8675	30.5941	NaN	30.5965	29.4132	31.8923	30.8988	13	13	13	P31025
sp|P00738|HPT_HUMAN	27.2038	27.5389	27.4109	27.8433	27.5808	27.3277	27.0182	27.1098	28.576	28.4637	28.5363	27.3007	29.0092	NaN	NaN	26.1878	NaN	NaN	26.3321	28.2226	28.021	26.7012	29.0039	28.0907	29.1817	24	24	24	P00738
sp|Q8N4F0|BPIB2_HUMAN	29.68	29.3512	29.744	29.6286	29.54	29.7603	29.0682	29.5234	30.5425	29.7051	28.9338	26.5779	29.4544	30.8238	30.5951	31.3396	28.5768	30.1556	30.0085	27.6959	28.4908	29.6039	29.1941	29.833	28.2056	14	14	14	Q8N4F0
sp|P25311|ZA2G_HUMAN	29.5408	29.4147	29.8294	29.6665	29.9434	29.8909	29.1283	29.5752	29.901	29.7509	29.206	29.6585	30.5216	30.7209	30.3333	31.0992	29.5522	29.7453	28.8753	30.0916	29.8821	30.171	29.891	28.6728	29.311	15	15	15	P25311
sp|P02787|TRFE_HUMAN	30.3005	30.0204	30.2488	30.1945	30.8169	30.4945	30.0647	30.095	30.6001	31.3945	30.5646	29.5359	28.8182	30.0654	29.2343	28.6491	28.0319	29.4503	28.6433	30.3419	29.7768	29.7927	28.7473	29.825	30.3802	49	49	48	P02787
sp|P06702|S10A9_HUMAN	30.9826	30.7212	30.2929	30.4776	30.4798	30.5868	30.1113	30.9136	31.6123	30.3197	30.6583	29.971	29.8974	28.9552	29.7494	30.1045	28.3598	30.0241	27.874	30.5402	31.1141	30.6258	30.8747	30.1017	32.1342	10	10	10	P06702
sp|P60709|ACTB_HUMAN	31.7258	31.4993	31.1387	31.5716	31.4369	31.1645	31.2503	31.9553	31.3938	31.1624	30.3758	28.7112	31.2105	30.2645	31.3522	31.0534	29.2782	30.8489	29.9955	29.8028	30.8616	30.5923	29.3543	29.1793	30.032	14	14	8	P60709
sp|P0DOY3|IGLC3_HUMAN	30.3437	30.4304	30.8494	30.8147	30.1036	30.6637	30.7978	30.0596	29.9714	30.8837	31.6234	32.7422	30.4354	30.8327	30.8397	31.9994	29.4165	30.5374	30.1695	30.9991	31.0792	30.0719	31.2058	31.8352	30.4433	8	8	1	P0DOY3
sp|P01591|IGJ_HUMAN	30.106	30.7008	30.7554	30.767	30.4604	30.9638	30.0496	30.3088	30.5576	29.8114	31.3421	30.7478	30.9143	31.0774	30.8551	30.782	30.2702	30.8987	30.9033	30.2114	30.3181	30.3337	30.1931	30.9682	30.308	11	11	11	P01591
sp|P01857|IGHG1_HUMAN	30.7821	30.84	30.4534	30.3126	30.7912	30.1113	30.8026	30.3265	31.2198	32.0238	32.0502	29.7589	30.0196	29.2058	29.4337	29.3485	28.8422	30.7803	29.8964	31.1743	30.368	30.0387	29.4932	29.1786	30.1794	17	17	10	P01857
sp|P05109|S10A8_HUMAN	30.2911	30.5197	30.033	30.765	30.3732	30.2682	30.2213	30.4309	32.1598	30.6202	31.1242	28.4934	29.8999	28.2601	28.1821	29.2396	27.8206	30.6413	28.0951	29.8347	30.6274	30.6776	29.5952	29.6319	31.9719	13	13	13	P05109
sp|P12273|PIP_HUMAN	30.4886	30.6815	30.5988	30.7221	30.0866	30.5898	30.5218	30.6255	33.0301	32.1413	31.0596	28.4071	30.8911	31.2645	31.1868	31.068	31.0413	31.7357	30.9442	30.4917	30.3947	29.8308	30.7265	30.4508	30.23	14	14	14	P12273
sp|P01036|CYTS_HUMAN	31.5122	31.8444	31.9328	31.6814	31.743	31.9916	31.1194	31.9344	32.0525	31.5674	32.6719	28.3499	32.3386	32.5556	32.8658	32.4719	33.1457	33.073	33.1931	32.0785	31.9254	32.7425	31.441	31.7433	33.436	16	16	7	P01036
sp|P01834|IGKC_HUMAN	31.6211	31.7239	31.5292	31.6271	31.3419	31.2759	31.9584	31.1058	30.8336	31.2906	32.3315	32.3331	31.7812	31.788	31.8229	31.6668	31.3256	31.9292	31.5328	31.893	31.9216	31.7019	31.7885	32.1969	31.6407	11	11	11	P01834
sp|Q9HC84|MUC5B_HUMAN	32.5961	32.0245	32.5424	32.7561	32.4644	32.7867	32.8978	32.583	32.8047	32.0379	31.0399	33.3802	31.4903	33.6835	33.5853	33.8767	32.6509	32.9735	32.1344	30.4457	32.5783	33.0599	32.8416	33.2004	32.6997	79	79	72	Q9HC84
sp|P01833|PIGR_HUMAN	32.1523	32.8135	32.6433	32.5394	32.2481	32.3313	32.8995	32.7476	31.5138	31.7329	32.6099	32.5255	32.4712	32.2066	32.6338	32.3492	32.0584	32.5401	32.2402	32.7961	32.1759	32.5059	32.4269	32.943	31.9382	37	37	37	P01833
sp|P01876|IGHA1_HUMAN	33.039	33.9321	33.2292	33.6435	33.313	33.3369	33.6639	33.4833	31.7712	31.5327	33.0214	33.6023	31.8346	32.2684	32.1699	33.4285	32.9331	32.5201	31.973	32.7688	32.1318	33.0297	32.7243	33.8876	33.0967	19	19	9	P01876
sp|P04745|AMY1_HUMAN	33.0256	33.8391	33.0037	33.1056	33.4606	33.712	33.0526	33.97	34.1703	33.7692	33.0429	28.8908	33.7562	35.1502	34.5679	33.9966	34.0694	34.212	33.5901	33.9645	33.6899	33.3352	35.844	34.2204	32.4974	34	34	25	P04745
