# Supplementary material for: Label-free quantitation of the changes in salivary proteome associated with the chronic consumption of the betel nut ( Areca catechu )
Source: Royal Society of Chemistry journal article supplement (doi:10.1039/d1mo00391g), 2021-11-22
Supplement: d1mo00391g2.xlsx [file d1mo00391g2.xlsx]

## Sheet: BP
Analysis Type:	PANTHER Overrepresentation Test (Released 20200728)
Annotation Version and Release Date:	GO Ontology database DOI: 10.5281/zenodo.4081749 Released 2020-10-09
Analyzed List:	Client Text Box Input (Homo sapiens)
Reference List:	Homo sapiens (all genes in database)
Test Type:	FISHER
Correction:	FDR
GO biological process complete	Homo sapiens - REFLIST (20595)	Client Text Box Input (77)	Client Text Box Input (expected)	Client Text Box Input (over/under)	Client Text Box Input (fold Enrichment)	Client Text Box Input (raw P-value)	Client Text Box Input (FDR)
positive regulation of oxidative stress-induced intrinsic apoptotic signaling pathway (GO:1902177)	6	2	0.02	+	89.16	0.000378	0.0431
positive regulation of dopamine metabolic process (GO:0045964)	6	2	0.02	+	89.16	0.000378	0.0428
positive regulation of catecholamine metabolic process (GO:0045915)	6	2	0.02	+	89.16	0.000378	0.0425
removal of superoxide radicals (GO:0019430)	13	4	0.05	+	82.3	4.08e-07	0.000122
cellular response to superoxide (GO:0071451)	15	4	0.06	+	71.32	6.61e-07	0.000187
cellular response to oxygen radical (GO:0071450)	15	4	0.06	+	71.32	6.61e-07	0.000184
response to superoxide (GO:0000303)	18	4	0.07	+	59.44	1.24e-06	0.000333
response to oxygen radical (GO:0000305)	19	4	0.07	+	56.31	1.49e-06	0.000388
positive regulation of superoxide anion generation (GO:0032930)	21	3	0.08	+	38.21	9.51e-05	0.0131
regulation of systemic arterial blood pressure by renin-angiotensin (GO:0003081)	24	3	0.09	+	33.43	0.000136	0.018
regulation of superoxide anion generation (GO:0032928)	24	3	0.09	+	33.43	0.000136	0.0179
regulation of superoxide metabolic process (GO:0090322)	32	4	0.12	+	33.43	9.57e-06	0.00179
hydrogen peroxide metabolic process (GO:0042743)	42	5	0.16	+	31.84	8.53e-07	0.000233
regulation of lipopolysaccharide-mediated signaling pathway (GO:0031664)	27	3	0.1	+	29.72	0.000188	0.0234
regulation of oxidative stress-induced intrinsic apoptotic signaling pathway (GO:1902175)	28	3	0.1	+	28.66	0.000207	0.0253
hydrogen peroxide catabolic process (GO:0042744)	29	3	0.11	+	27.67	0.000228	0.0274
superoxide metabolic process (GO:0006801)	39	4	0.15	+	27.43	1.97e-05	0.00309
positive regulation of sodium ion transport (GO:0010765)	34	3	0.13	+	23.6	0.000352	0.0405
antibacterial humoral response (GO:0019731)	59	5	0.22	+	22.67	4.04e-06	0.000915
cellular oxidant detoxification (GO:0098869)	95	6	0.36	+	16.89	2.1e-06	0.000528
antimicrobial humoral response (GO:0019730)	156	9	0.58	+	15.43	1.07e-08	4.25e-06
cellular detoxification (GO:1990748)	108	6	0.4	+	14.86	4.25e-06	0.000936
cellular response to toxic substance (GO:0097237)	116	6	0.43	+	13.83	6.29e-06	0.00128
negative regulation of endopeptidase activity (GO:0010951)	252	13	0.94	+	13.8	1.67e-11	1.1e-08
reactive oxygen species metabolic process (GO:0072593)	119	6	0.44	+	13.49	7.23e-06	0.00145
retina homeostasis (GO:0001895)	80	4	0.3	+	13.37	0.000274	0.0324
negative regulation of peptidase activity (GO:0010466)	261	13	0.98	+	13.32	2.53e-11	1.54e-08
antimicrobial humoral immune response mediated by antimicrobial peptide (GO:0061844)	103	5	0.39	+	12.98	5.2e-05	0.00749
killing of cells of other organism (GO:0031640)	84	4	0.31	+	12.74	0.000327	0.0379
platelet degranulation (GO:0002576)	129	6	0.48	+	12.44	1.12e-05	0.00205
detoxification (GO:0098754)	132	6	0.49	+	12.16	1.28e-05	0.0023
regulation of sodium ion transport (GO:0002028)	90	4	0.34	+	11.89	0.000421	0.0464
cornification (GO:0070268)	113	5	0.42	+	11.83	7.92e-05	0.0112
complement activation, classical pathway (GO:0006958)	161	7	0.6	+	11.63	3.08e-06	0.000752
humoral immune response mediated by circulating immunoglobulin (GO:0002455)	166	7	0.62	+	11.28	3.74e-06	0.000873
cell killing (GO:0001906)	120	5	0.45	+	11.14	0.000104	0.014
humoral immune response (GO:0006959)	387	16	1.45	+	11.06	1.5e-12	1.19e-09
negative regulation of proteolysis (GO:0045861)	349	14	1.3	+	10.73	6.38e-11	3.61e-08
complement activation (GO:0006956)	177	7	0.66	+	10.58	5.62e-06	0.00117
neutrophil degranulation (GO:0043312)	482	19	1.8	+	10.54	1.99e-14	3.95e-11
neutrophil activation involved in immune response (GO:0002283)	486	19	1.82	+	10.46	2.3e-14	4.05e-11
cellular response to reactive oxygen species (GO:0034614)	129	5	0.48	+	10.37	0.000144	0.0188
neutrophil mediated immunity (GO:0002446)	493	19	1.84	+	10.31	2.94e-14	4.67e-11
neutrophil activation (GO:0042119)	494	19	1.85	+	10.29	3.05e-14	4.03e-11
granulocyte activation (GO:0036230)	498	19	1.86	+	10.2	3.5e-14	4.28e-11
leukocyte degranulation (GO:0043299)	504	19	1.88	+	10.08	4.31e-14	4.88e-11
immune response-regulating cell surface receptor signaling pathway involved in phagocytosis (GO:0002433)	135	5	0.5	+	9.91	0.000177	0.0227
Fc-gamma receptor signaling pathway involved in phagocytosis (GO:0038096)	135	5	0.5	+	9.91	0.000177	0.0225
myeloid leukocyte mediated immunity (GO:0002444)	514	19	1.92	+	9.89	6.05e-14	6.39e-11
myeloid cell activation involved in immune response (GO:0002275)	519	19	1.94	+	9.79	7.14e-14	7.08e-11
Fc receptor mediated stimulatory signaling pathway (GO:0002431)	138	5	0.52	+	9.69	0.000196	0.0242
Fc-gamma receptor signaling pathway (GO:0038094)	138	5	0.52	+	9.69	0.000196	0.0241
leukocyte mediated immunity (GO:0002443)	762	27	2.85	+	9.48	2.36e-19	3.74e-15
positive regulation of B cell activation (GO:0050871)	171	6	0.64	+	9.38	5.19e-05	0.00755
immunoglobulin mediated immune response (GO:0016064)	203	7	0.76	+	9.22	1.33e-05	0.00237
B cell mediated immunity (GO:0019724)	206	7	0.77	+	9.09	1.46e-05	0.00251
regulated exocytosis (GO:0045055)	691	23	2.58	+	8.9	7.13e-16	2.83e-12
myeloid leukocyte activation (GO:0002274)	584	19	2.18	+	8.7	5.41e-13	4.52e-10
defense response to bacterium (GO:0042742)	348	11	1.3	+	8.45	8.93e-08	2.95e-05
regulation of reactive oxygen species metabolic process (GO:2000377)	191	6	0.71	+	8.4	9.38e-05	0.0131
response to reactive oxygen species (GO:0000302)	194	6	0.73	+	8.27	0.000102	0.0138
regulation of endopeptidase activity (GO:0052548)	424	13	1.59	+	8.2	7.59e-09	3.17e-06
leukocyte activation involved in immune response (GO:0002366)	622	19	2.33	+	8.17	1.58e-12	1.2e-09
lymphocyte mediated immunity (GO:0002449)	263	8	0.98	+	8.14	7.57e-06	0.00148
cell activation involved in immune response (GO:0002263)	626	19	2.34	+	8.12	1.77e-12	1.27e-09
negative regulation of hydrolase activity (GO:0051346)	462	14	1.73	+	8.11	2.17e-09	9.86e-07
adaptive immune response based on somatic recombination of immune receptors built from immunoglobulin superfamily domains (GO:0002460)	272	8	1.02	+	7.87	9.61e-06	0.00177
exocytosis (GO:0006887)	787	23	2.94	+	7.82	1.06e-14	2.39e-11
regulation of peptidase activity (GO:0052547)	454	13	1.7	+	7.66	1.67e-08	6.15e-06
positive regulation of ion transport (GO:0043270)	289	8	1.08	+	7.4	1.47e-05	0.00251
regulation of B cell activation (GO:0050864)	217	6	0.81	+	7.4	0.000185	0.0232
blood coagulation (GO:0007596)	291	8	1.09	+	7.35	1.55e-05	0.00258
coagulation (GO:0050817)	293	8	1.1	+	7.3	1.62e-05	0.00263
phagocytosis (GO:0006909)	333	9	1.25	+	7.23	5.02e-06	0.00109
hemostasis (GO:0007599)	296	8	1.11	+	7.23	1.74e-05	0.00276
immune effector process (GO:0002252)	1095	29	4.09	+	7.08	1.59e-17	1.26e-13
secretion by cell (GO:0032940)	976	25	3.65	+	6.85	1.04e-14	2.74e-11
response to toxic substance (GO:0009636)	239	6	0.89	+	6.71	0.000306	0.036
secretion (GO:0046903)	1092	27	4.08	+	6.61	1.51e-15	4.79e-12
export from cell (GO:0140352)	1024	25	3.83	+	6.53	3.01e-14	4.34e-11
leukocyte activation (GO:0045321)	931	21	3.48	+	6.03	2.34e-11	1.49e-08
immune response-activating cell surface receptor signaling pathway (GO:0002429)	450	10	1.68	+	5.94	7.81e-06	0.00151
immune response-activating signal transduction (GO:0002757)	450	10	1.68	+	5.94	7.81e-06	0.00149
epidermal cell differentiation (GO:0009913)	319	7	1.19	+	5.87	0.000213	0.0257
cell activation (GO:0001775)	1075	23	4.02	+	5.72	5.92e-12	4.08e-09
leukocyte migration (GO:0050900)	381	8	1.42	+	5.62	9.92e-05	0.0136
immune response-regulating cell surface receptor signaling pathway (GO:0002768)	486	10	1.82	+	5.5	1.5e-05	0.00254
regulation of lymphocyte activation (GO:0051249)	536	11	2	+	5.49	5.55e-06	0.00117
wound healing (GO:0042060)	439	9	1.64	+	5.48	4.26e-05	0.00638
immune response-regulating signaling pathway (GO:0002764)	489	10	1.83	+	5.47	1.58e-05	0.00259
regulation of body fluid levels (GO:0050878)	492	10	1.84	+	5.44	1.67e-05	0.00267
regulation of metal ion transport (GO:0010959)	394	8	1.47	+	5.43	0.000124	0.0166
innate immune response (GO:0045087)	843	17	3.15	+	5.39	1.34e-08	5.19e-06
regulation of cation transmembrane transport (GO:1904062)	353	7	1.32	+	5.3	0.000387	0.0433
regulation of apoptotic signaling pathway (GO:2001233)	359	7	1.34	+	5.22	0.000428	0.0465
defense response to other organism (GO:0098542)	1036	20	3.87	+	5.16	1.12e-09	5.56e-07
regulation of leukocyte activation (GO:0002694)	625	12	2.34	+	5.14	3.9e-06	0.000896
activation of immune response (GO:0002253)	523	10	1.96	+	5.11	2.78e-05	0.00432
regulation of proteolysis (GO:0030162)	735	14	2.75	+	5.09	6.03e-07	0.000177
response to wounding (GO:0009611)	540	10	2.02	+	4.95	3.63e-05	0.00553
negative regulation of catalytic activity (GO:0043086)	820	15	3.07	+	4.89	3.73e-07	0.000114
regulation of inflammatory response (GO:0050727)	550	10	2.06	+	4.86	4.22e-05	0.00638
regulation of cell activation (GO:0050865)	667	12	2.49	+	4.81	7.45e-06	0.00148
negative regulation of response to external stimulus (GO:0032102)	557	10	2.08	+	4.8	4.69e-05	0.00689
immune response (GO:0006955)	1951	35	7.29	+	4.8	3.28e-16	1.73e-12
positive regulation of immune response (GO:0050778)	732	13	2.74	+	4.75	3.41e-06	0.000819
response to bacterium (GO:0009617)	734	13	2.74	+	4.74	3.51e-06	0.000831
defense response (GO:0006952)	1429	25	5.34	+	4.68	4.05e-11	2.38e-08
negative regulation of cellular protein metabolic process (GO:0032269)	1053	18	3.94	+	4.57	5.61e-08	1.94e-05
regulation of immune effector process (GO:0002697)	474	8	1.77	+	4.51	0.000424	0.0464
vesicle-mediated transport (GO:0016192)	1964	32	7.34	+	4.36	1.55e-13	1.36e-10
negative regulation of protein metabolic process (GO:0051248)	1109	18	4.15	+	4.34	1.21e-07	3.91e-05
positive regulation of immune system process (GO:0002684)	1051	17	3.93	+	4.33	3.05e-07	9.48e-05
response to other organism (GO:0051707)	1427	23	5.34	+	4.31	1.48e-09	7.11e-07
response to external biotic stimulus (GO:0043207)	1429	23	5.34	+	4.3	1.52e-09	7.09e-07
regulation of response to external stimulus (GO:0032101)	1203	19	4.5	+	4.22	7.61e-08	2.57e-05
response to biotic stimulus (GO:0009607)	1464	23	5.47	+	4.2	2.4e-09	1.06e-06
regulation of ion transport (GO:0043269)	717	11	2.68	+	4.1	7.71e-05	0.011
negative regulation of molecular function (GO:0044092)	1176	17	4.4	+	3.87	1.42e-06	0.000375
regulation of immune response (GO:0050776)	1134	16	4.24	+	3.77	4.16e-06	0.000931
regulation of defense response (GO:0031347)	856	12	3.2	+	3.75	8.28e-05	0.0116
positive regulation of transport (GO:0051050)	939	13	3.51	+	3.7	4.59e-05	0.00681
immune system process (GO:0002376)	2856	38	10.68	+	3.56	1.4e-13	1.3e-10
regulation of hydrolase activity (GO:0051336)	1298	17	4.85	+	3.5	5.28e-06	0.00113
regulation of immune system process (GO:0002682)	1705	22	6.37	+	3.45	1.9e-07	6.03e-05
establishment of localization in cell (GO:0051649)	2367	29	8.85	+	3.28	2.97e-09	1.27e-06
interspecies interaction between organisms (GO:0044419)	2125	26	7.94	+	3.27	2.83e-08	1.02e-05
negative regulation of cell death (GO:0060548)	1025	12	3.83	+	3.13	0.000429	0.0463
regulation of response to stress (GO:0080134)	1566	18	5.85	+	3.07	1.57e-05	0.00259
response to external stimulus (GO:0009605)	2532	29	9.47	+	3.06	1.37e-08	5.17e-06
positive regulation of response to stimulus (GO:0048584)	2295	24	8.58	+	2.8	2.02e-06	0.000517
response to stress (GO:0006950)	3648	38	13.64	+	2.79	2.6e-10	1.42e-07
cellular localization (GO:0051641)	2988	31	11.17	+	2.77	3.46e-08	1.22e-05
regulation of cellular protein metabolic process (GO:0032268)	2661	26	9.95	+	2.61	2.29e-06	0.000568
regulation of catalytic activity (GO:0050790)	2384	23	8.91	+	2.58	1.36e-05	0.00236
regulation of transport (GO:0051049)	1799	17	6.73	+	2.53	0.000307	0.0358
regulation of protein metabolic process (GO:0051246)	2798	26	10.46	+	2.49	5.81e-06	0.0012
transport (GO:0006810)	4543	42	16.99	+	2.47	6.22e-10	3.18e-07
establishment of localization (GO:0051234)	4683	43	17.51	+	2.46	3.92e-10	2.07e-07
regulation of molecular function (GO:0065009)	3067	27	11.47	+	2.35	1.35e-05	0.00237
regulation of localization (GO:0032879)	2771	23	10.36	+	2.22	0.000157	0.0203
regulation of biological quality (GO:0065008)	4013	32	15	+	2.13	8.74e-06	0.00165
regulation of response to stimulus (GO:0048583)	4275	32	15.98	+	2	3.29e-05	0.00506
localization (GO:0051179)	5832	43	21.8	+	1.97	6.55e-07	0.000189
response to chemical (GO:0042221)	4392	30	16.42	+	1.83	0.000419	0.0464
response to stimulus (GO:0050896)	8502	57	31.79	+	1.79	8.1e-09	3.29e-06
positive regulation of biological process (GO:0048518)	6275	39	23.46	+	1.66	0.000263	0.0314

## Sheet: MF
Analysis Type:	PANTHER Overrepresentation Test (Released 20200728)
Annotation Version and Release Date:	GO Ontology database DOI: 10.5281/zenodo.4081749 Released 2020-10-09
Analyzed List:	Client Text Box Input (Homo sapiens)
Reference List:	Homo sapiens (all genes in database)
Test Type:	FISHER
Correction:	FDR
GO molecular function complete	Homo sapiens - REFLIST (20595)	Client Text Box Input (77)	Client Text Box Input (expected)	Client Text Box Input (over/under)	Client Text Box Input (fold Enrichment)	Client Text Box Input (raw P-value)	Client Text Box Input (FDR)
serine-type endopeptidase inhibitor activity (GO:0004867)	100	9	0.37	+	24.07	2.7e-10	3.22e-07
copper ion binding (GO:0005507)	61	5	0.23	+	21.92	4.7e-06	0.00225
antioxidant activity (GO:0016209)	90	6	0.34	+	17.83	1.56e-06	0.00093
endopeptidase inhibitor activity (GO:0004866)	184	11	0.69	+	15.99	1.54e-10	7.36e-07
peptidase inhibitor activity (GO:0030414)	190	11	0.71	+	15.48	2.13e-10	5.09e-07
endopeptidase regulator activity (GO:0061135)	193	11	0.72	+	15.24	2.5e-10	3.98e-07
peptidase regulator activity (GO:0061134)	231	11	0.86	+	12.74	1.53e-09	1.46e-06
actin filament binding (GO:0051015)	209	8	0.78	+	10.24	1.46e-06	0.001
antigen binding (GO:0003823)	185	7	0.69	+	10.12	7.42e-06	0.00322
enzyme inhibitor activity (GO:0004857)	394	13	1.47	+	8.83	3.24e-09	2.58e-06
enzyme regulator activity (GO:0030234)	1081	16	4.04	+	3.96	2.27e-06	0.00121
signaling receptor binding (GO:0005102)	1700	18	6.36	+	2.83	4.63e-05	0.0184

## Sheet: CC
Analysis Type:	PANTHER Overrepresentation Test (Released 20200728)
Annotation Version and Release Date:	GO Ontology database DOI: 10.5281/zenodo.4081749 Released 2020-10-09
Analyzed List:	Client Text Box Input (Homo sapiens)
Reference List:	Homo sapiens (all genes in database)
Test Type:	FISHER
Correction:	FDR
GO cellular component complete	Homo sapiens - REFLIST (20595)	Client Text Box Input (77)	Client Text Box Input (expected)	Client Text Box Input (over/under)	Client Text Box Input (fold Enrichment)	Client Text Box Input (raw P-value)	Client Text Box Input (FDR)
specific granule lumen (GO:0035580)	62	5	0.23	+	21.57	5.07e-06	0.000508
protein-lipid complex (GO:0032994)	40	3	0.15	+	20.06	0.000551	0.0381
blood microparticle (GO:0072562)	144	10	0.54	+	18.57	2.81e-10	4.33e-08
secretory granule lumen (GO:0034774)	321	16	1.2	+	13.33	9.7e-14	2.16e-11
cytoplasmic vesicle lumen (GO:0060205)	325	16	1.22	+	13.17	1.16e-13	2.33e-11
vesicle lumen (GO:0031983)	327	16	1.22	+	13.09	1.27e-13	2.32e-11
specific granule (GO:0042581)	160	7	0.6	+	11.7	2.96e-06	0.000313
ficolin-1-rich granule (GO:0101002)	185	8	0.69	+	11.57	6.06e-07	7.15e-05
immunoglobulin complex (GO:0019814)	189	8	0.71	+	11.32	7.07e-07	7.88e-05
immunoglobulin complex, circulating (GO:0042571)	95	4	0.36	+	11.26	0.000512	0.0367
ficolin-1-rich granule lumen (GO:1904813)	124	5	0.46	+	10.78	0.000121	0.0101
tertiary granule (GO:0070820)	164	6	0.61	+	9.79	4.14e-05	0.00361
collagen-containing extracellular matrix (GO:0062023)	424	14	1.59	+	8.83	7.44e-10	1.07e-07
extracellular matrix (GO:0031012)	566	17	2.12	+	8.03	3.66e-11	6.12e-09
secretory granule (GO:0030141)	864	25	3.23	+	7.74	6.82e-16	1.96e-13
endoplasmic reticulum lumen (GO:0005788)	313	8	1.17	+	6.84	2.57e-05	0.00246
secretory vesicle (GO:0099503)	1031	25	3.85	+	6.49	3.49e-14	8.76e-12
extracellular exosome (GO:0070062)	2098	48	7.84	+	6.12	2.36e-28	1.58e-25
extracellular vesicle (GO:1903561)	2119	48	7.92	+	6.06	3.67e-28	1.84e-25
extracellular organelle (GO:0043230)	2121	48	7.93	+	6.05	3.82e-28	1.53e-25
extracellular space (GO:0005615)	3389	66	12.67	+	5.21	3e-40	3.01e-37
focal adhesion (GO:0005925)	416	8	1.56	+	5.14	0.000179	0.0144
cell-substrate junction (GO:0030055)	423	8	1.58	+	5.06	0.0002	0.0155
extracellular region (GO:0005576)	4402	71	16.46	+	4.31	2.34e-40	4.69e-37
vesicle (GO:0031982)	3928	58	14.69	+	3.95	2.44e-26	8.16e-24
anchoring junction (GO:0070161)	834	11	3.12	+	3.53	0.000283	0.0211
cytoplasmic vesicle (GO:0031410)	2442	30	9.13	+	3.29	1.3e-09	1.73e-07
intracellular vesicle (GO:0097708)	2447	30	9.15	+	3.28	1.36e-09	1.71e-07
endomembrane system (GO:0012505)	4640	34	17.35	+	1.96	2.74e-05	0.0025
